# Supplementary material for: Towards organo-click reactions: development of pharmaceutical ingredients by using direct organocatalytic bio-mimetic reductions
Source: Royal Society of Chemistry journal article supplement (doi:10.1039/b612611a), 2006-01-01
Supplement: b612611a.pdf [file b612611a.pdf]

## Supporting Information

# Towards organo-click reactions: development of pharmaceutical ingredients by using direct organocatalytic bio-mimetic reductions

**Dhevalapally B. Ramachary\* and G. Babul Reddy**

*School of Chemistry, University of Hyderabad, Central University (P.O.),  
Hyderabad 500 046, India*

[ramsc@uohyd.ernet.in](mailto:ramsc@uohyd.ernet.in)

**General Methods:** The  $^1\text{H}$  NMR and  $^{13}\text{C}$  NMR spectra were recorded at 400 MHz and 100 MHz, respectively. The chemical shifts are reported in ppm downfield to TMS ( $\delta = 0$ ) or DMSO- $\text{D}_6$  ( $\delta = 2.5$ ) for  $^1\text{H}$  NMR and relative to the central  $\text{CDCl}_3$  resonance ( $\delta = 77.0$ ) or DMSO- $\text{D}_6$  ( $\delta = 40.0$ ) for  $^{13}\text{C}$  NMR. *In the  $^{13}\text{C}$  NMR spectra, the nature of the carbons (C, CH,  $\text{CH}_2$  or  $\text{CH}_3$ ) was determined by recording the DEPT-135 experiment, and is given in parentheses.* The coupling constants  $J$  are given in Hz. Column chromatography was performed using Acme's silica gel (particle size 0.063-0.200 mm). High-resolution mass spectra were recorded on micromass ESI-TOF MS. GCMS mass spectrometry was performed on Shimadzu GCMS-QP2010 mass spectrometer. IR spectra were recorded on JASCO FT/IR-5300. For thin-layer chromatography (TLC), silica gel plates Merck 60 F254 were used and compounds were visualized by irradiation with UV light and/or by treatment with a solution of *p*-anisaldehyde (23 mL), conc.  $\text{H}_2\text{SO}_4$  (35 mL), acetic acid (10 mL), and ethanol (900 mL) followed by heating.

*Due to the N-H bond resonance nature in 2-alkyl or 2-aryl-1H-benzoimidazole compounds,  $^{13}\text{C}$  NMR shows some of carbons (3 x CH and 2 x C) are poor resolution even after more scans.*

**Materials:** All solvents and commercially available chemicals were used as received.

### **General Experimental Procedures for the Organo-Click Reductions:**

**Proline-Catalyzed Knoevenagel/Hydrogenation Reactions in One-Pot:** In an ordinary glass vial equipped with a magnetic stirring bar, to 0.5 mmol of the aldehyde **1a-u** and 0.5 mmol of CH-acid **2** was added 1.0 mL of solvent, and then the catalyst proline **4a** (0.1 mmol) was added and the reaction mixture was stirred at 25 °C for 1.5 to 4 h, then *o*-phenylenediamine **3** (0.5 mmol) and benzaldehyde **1a** (0.5 mmol) was added and stirred for the time indicated in Table 5. Pure one-pot products **7** and **8** were obtained by simple filtration of crude product through sintered funnel with dichloromethane to produce

85-90% of purity. High purity products were obtained by column chromatography (silica gel, mixture of hexane/ethyl acetate).

**Proline-Catalyzed Cascade Knoevenagel/Hydrogenation Reactions:** In an ordinary glass vial equipped with a magnetic stirring bar, to 1.0 mmol of the aldehyde **1a-u**, 0.5 mmol of CH-acid **2** and 0.5 mmol of o-phenylenediamine **3** was added 1.0 mL of solvent, and then the catalyst proline **4a** (0.1 mmol) was added and the reaction mixture was stirred at 25 °C for the time indicated in Tables 1, 3 and 4. Pure cascade products **7** and **8** were obtained by simple filtration of crude product through sintered funnel with dichloromethane to produce 85-90% of purity. High purity products were obtained by column chromatography (silica gel, mixture of hexane/ethyl acetate).

**Proline/K<sub>2</sub>CO<sub>3</sub>-Catalyzed Knoevenagel/Hydrogenation/Alkylation Reactions in One-Pot:** In an ordinary glass vial equipped with a magnetic stirring bar, to 0.5 mmol of the aldehyde **1a-u** and 0.5 mmol of CH-acid **2** was added 2.0 mL of solvent, and then the catalyst proline **4a** (0.1 mmol) was added and the reaction mixture was stirred at 25 °C for 1.5 to 4 h, then o-phenylenediamine **3** (0.5 mmol) and benzaldehyde **1a** (0.5 mmol) was added and stirred for the time indicated in Table 6. Then RCH<sub>2</sub>-I **9** (4.0 mmol) or RCH<sub>2</sub>-Br **9** (2.5 mmol) and K<sub>2</sub>CO<sub>3</sub> (4.0 mmol) was added and stirred at room temperature for 6 h. The crude reaction mixture was worked up with aqueous NH<sub>4</sub>Cl solution and the aqueous layer was extracted with dichloromethane (2 x 20 mL). The combined organic layers were dried (Na<sub>2</sub>SO<sub>4</sub>), filtered and concentrated. Pure one-pot products **10** and **11** were obtained by column chromatography (silica gel, mixture of hexane/ethyl acetate).

**Proline/K<sub>2</sub>CO<sub>3</sub>/Cu<sup>I</sup>-Catalyzed Knoevenagel/Hydrogenation/Alkylation/Huisgen Cycloaddition Reactions in One-Pot:** In an ordinary glass vial equipped with a magnetic stirring bar, solvent (2.0 mL) was added to the aldehyde **1** (0.5 mmol) and the CH-acid **2** (0.5 mmol). The proline catalyst **4a** (0.1 mmol) was added and the reaction mixture was stirred at 25 °C for 1-4 h. o-Phenylenediamine **3** (0.5 mmol) and benzaldehyde **1a** (0.5 mmol) were then added and stirring continued at the same temperature for 1-3 h. HC≡CCH<sub>2</sub>Br **9d** (2.5 mmol) and K<sub>2</sub>CO<sub>3</sub> (4.0 mmol) were then added and stirring continued at the same temperature for 6 h. Excess propargyl bromide **9d** was removed by vacuum pump then CuSO<sub>4</sub> (0.75 mmol), Cu wire (10 mg) and benzyl azide (0.75 mmol) were added and stirring continued at the same temperature for 18 h. The crude reaction mixture was worked up with aqueous NH<sub>4</sub>Cl and the aqueous layer extracted with dichloromethane (2 x 20 mL). The combined organic layers were dried (Na<sub>2</sub>SO<sub>4</sub>), filtered and concentrated. Pure products **12** were obtained by column chromatography (silica gel, mixture of hexane/ethyl acetate).

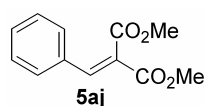

**2-Benzylidene-malonic acid dimethyl ester (5aj):** Purified by column chromatography using EtOAc/hexane and isolated as white solid. IR (neat):  $\nu_{\max}$  3028, 2953, 1732 (O=C=O), 1630, 1575, 1437, 1265, 1064, 831 and 694 cm<sup>-1</sup>; <sup>1</sup>H NMR (CDCl<sub>3</sub>)  $\delta$  7.75 (1H, s, olefinic-H), 7.38 (5H, m, Ar-H), 3.82 (6H, s, CO<sub>2</sub>CH<sub>3</sub>); <sup>13</sup>C NMR (CDCl<sub>3</sub>, DEPT-135)  $\delta$  167.1 (C, O=C=O), 164.4 (C, O=C=O), 142.9 (CH), 132.7 (C), 130.6 (CH), 129.3

(2 x CH), 128.8 (2 x CH), 125.4 (C), 52.6 (CH<sub>3</sub>, OCH<sub>3</sub>); LRMS m/z 221.10 (M + H<sup>+</sup>), calcd for C<sub>12</sub>H<sub>12</sub>O<sub>4</sub> 220.0736; HRMS m/z 243.0626 (M + Na<sup>+</sup>), calcd for C<sub>12</sub>H<sub>12</sub>O<sub>4</sub>Na 243.0633.

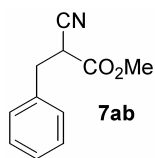

**7ab**

**2-Cyano-3-phenyl-propionic acid methyl ester (7ab):** Purified by column chromatography using EtOAc/hexane and isolated as a liquid. IR (neat):  $\nu_{\max}$  3043, 2957, 2251 (C≡N), 1751 (O-C=O), 1604, 1440, 1275, 1028, 860 and 702 cm<sup>-1</sup>; <sup>1</sup>H NMR (CDCl<sub>3</sub>)  $\delta$  7.31 (5H, m, Ar-H), 3.78 (3H, s, OCH<sub>3</sub>), 3.74 (1H, dd,  $J$  = 8.4, 6.0 Hz), 3.23 (2H, dABq,  $J$  = 14.0, 5.6 Hz); <sup>13</sup>C NMR (CDCl<sub>3</sub>, DEPT-135)  $\delta$  165.9 (C, O-C=O), 135.1 (C), 128.8 (2 x CH), 128.7 (2 x CH), 127.7 (CH), 115.9 (C, C≡N), 53.4 (CH<sub>3</sub>, OCH<sub>3</sub>), 39.4 (CH), 35.6 (CH<sub>2</sub>); LRMS m/z 188.10 (M - H<sup>+</sup>), calcd for C<sub>11</sub>H<sub>11</sub>NO<sub>2</sub> 189.0790.

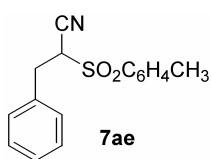

**7ae**

**1-Cyano-2-phenyl-ethanesulfinic acid p-tolyl ester (7ae):** Purified by column chromatography using EtOAc/hexane and isolated as a white solid. IR (neat):  $\nu_{\max}$  3030, 2926, 2249 (C≡N), 1739, 1597, 1496, 1334, 1153, 1030, 815, 667, 636 and 518 cm<sup>-1</sup>; <sup>1</sup>H NMR (CDCl<sub>3</sub>)  $\delta$  7.94 (2H, d,  $J$  = 7.4 Hz), 7.45 (2H, d,  $J$  = 8.0 Hz), 7.33 (5H, m) [Ar-H]; 4.06 (1H, dd,  $J$  = 11.6, 3.6 Hz), 3.57 (1H, dd,  $J$  = 16.0, 4.0 Hz), 3.07 (1H, t,  $J$  = 12.8 Hz), 2.50 (3H, s, Ar-CH<sub>3</sub>); <sup>13</sup>C NMR (CDCl<sub>3</sub>, DEPT-135)  $\delta$  146.8 (C), 133.6 (C), 132.4 (C), 130.3 (2 x CH), 129.7 (2 x CH), 129.1 (2 x CH), 129.0 (2 x CH), 128.1 (CH), 113.8 (C, C≡N), 59.5 (CH), 32.8 (CH<sub>2</sub>), 21.8 (CH<sub>3</sub>, Ar-CH<sub>3</sub>); LRMS m/z 284.05 (M - H<sup>+</sup>), calcd for C<sub>16</sub>H<sub>15</sub>NO<sub>2</sub>S 285.0823; HRMS m/z 308.0725 (M + Na<sup>+</sup>), calcd for C<sub>16</sub>H<sub>15</sub>NO<sub>2</sub>SNa 308.0721.

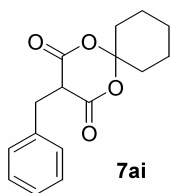

**7ai**

**3-Benzyl-1,5-dioxaspiro[5.5]undecane-2,4-dione (7ai):** Purified by column chromatography using EtOAc/hexane and isolated as a white solid. IR (KBr):  $\nu_{\max}$  3003, 2943, 1753 (O-C=O), 1498, 1095, 1018, 698, 505 and 462 cm<sup>-1</sup>; <sup>1</sup>H NMR (CDCl<sub>3</sub>)  $\delta$  7.26 (5H, m, Ar-H); 3.79 (1H, t,  $J$  = 5.2 Hz), 3.47 (2H, d,  $J$  = 4.8 Hz), 1.92 (2H, t,  $J$  = 6.0 Hz), 1.64 (6H, m), 1.43 (2H, t,  $J$  = 4.4 Hz); <sup>13</sup>C NMR (CDCl<sub>3</sub>, DEPT-135)  $\delta$  165.3 (C, O-C=O), 137.3 (C), 129.6 (2 x CH), 128.5 (2 x CH), 127.0 (CH), 105.9 (C), 48.4 (CH), 37.0 (CH<sub>2</sub>), 36.1 (CH<sub>2</sub>), 32.2 (CH<sub>2</sub>), 23.9 (CH<sub>2</sub>), 22.3 (CH<sub>2</sub>), 21.7 (CH<sub>2</sub>); LRMS m/z 273.10 (M - H<sup>+</sup>), calcd for C<sub>16</sub>H<sub>18</sub>O<sub>4</sub> 274.1205; HRMS m/z 297.1090 (M + Na<sup>+</sup>), calcd for C<sub>16</sub>H<sub>18</sub>O<sub>4</sub>Na 297.1103.

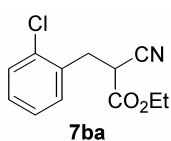

**7ba**

**3-(2-Chloro-phenyl)-2-cyano-propionic acid ethyl ester (7ba):** Purified by column chromatography using EtOAc/hexane and isolated as a liquid. IR (neat):  $\nu_{\max}$  3063, 2986, 2251 (C≡N), 1747 (O-C=O), 1595, 1097, 949, 756 and 680 cm<sup>-1</sup>; <sup>1</sup>H NMR (CDCl<sub>3</sub>)  $\delta$  7.38 (1H, m), 7.34 (1H, m), 7.26 (2H, m) [Ar-H]; 4.25 (2H, q,  $J$  = 7.2 Hz, OCH<sub>2</sub>CH<sub>3</sub>); 3.91 (1H, dd,  $J$  = 8.8, 6.8 Hz), 3.51 (1H, dd,  $J$  = 13.6, 6.0 Hz), 3.20 (1H, dd,  $J$  = 13.6, 9.6 Hz), 1.29 (3H, t,  $J$  = 7.2 Hz, OCH<sub>2</sub>CH<sub>3</sub>); <sup>13</sup>C NMR (CDCl<sub>3</sub>, DEPT-135)  $\delta$  165.2 (C, O-C=O), 133.9 (C, C-Cl), 133.0 (C), 131.6 (CH), 129.7 (CH), 129.3 (CH), 127.2 (CH), 115.8 (C, C≡N), 62.9 (CH<sub>2</sub>, OCH<sub>2</sub>CH<sub>3</sub>), 37.3 (CH), 33.7 (CH<sub>2</sub>), 13.8 (CH<sub>3</sub>, OCH<sub>2</sub>CH<sub>3</sub>); LRMS m/z 236.05 (M - H<sup>+</sup>), calcd for C<sub>12</sub>H<sub>12</sub>ClNO<sub>2</sub> 237.0557; HRMS m/z 260.0450 (M + Na<sup>+</sup>), calcd for C<sub>12</sub>H<sub>12</sub>ClNO<sub>2</sub>Na 260.0454.

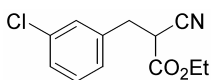

**7ca**

**3-(3-Chloro-phenyl)-2-cyano-propionic acid ethyl ester (7ca):** Purified by column chromatography using EtOAc/hexane and isolated as a liquid. IR (neat):  $\nu_{\max}$  3065, 2984, 2251

(C≡N), 1745 (O-C=O), 1599, 1477, 1082, 1028, 877, 785 and 698 cm<sup>-1</sup>; <sup>1</sup>H NMR (CDCl<sub>3</sub>) δ 7.26 (4H, m, Ar-H), 4.24 (2H, q, *J* = 7.2 Hz, OCH<sub>2</sub>CH<sub>3</sub>), 3.72 (1H, t, *J* = 8.0 Hz), 3.22 (2H, dABq, *J* = 14.0, 6.0 Hz), 1.28 (3H, t, *J* = 7.2 Hz, OCH<sub>2</sub>CH<sub>3</sub>); <sup>13</sup>C NMR (CDCl<sub>3</sub>, DEPT-135) δ 165.1 (C, O-C=O), 137.1 (C, C-Cl), 134.5 (C), 130.1 (CH), 129.1 (CH), 128.0 (CH), 127.2 (CH), 115.7 (C, C≡N), 63.0 (CH<sub>2</sub>, OCH<sub>2</sub>CH<sub>3</sub>), 39.2 (CH), 35.1 (CH<sub>2</sub>), 13.9 (CH<sub>3</sub>, OCH<sub>2</sub>CH<sub>3</sub>); LRMS *m/z* 238.10 (M + H<sup>+</sup>), calcd for C<sub>12</sub>H<sub>12</sub>ClNO<sub>2</sub> 237.0557; HRMS *m/z* 238.0637 (M + H<sup>+</sup>), calcd for C<sub>12</sub>H<sub>12</sub>ClNO<sub>2</sub>H 238.0635.

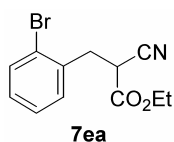

**3-(2-Bromo-phenyl)-2-cyano-propionic acid ethyl ester (7ea):** Purified by column chromatography using EtOAc/hexane and isolated as a white solid. IR (neat):  $\nu_{\max}$  3063, 2986, 2251 (C≡N), 1747 (O-C=O), 1606, 1570, 1263, 1093, 754 and 659 cm<sup>-1</sup>; <sup>1</sup>H NMR (CDCl<sub>3</sub>) δ 7.56 (1H, dd, *J* = 7.6, 2.0 Hz), 7.35-7.28 (2H, m),

7.17 (1H, dt, *J* = 7.6, 2.0 Hz) [Ar-H]; 4.26 (1H, q, *J* = 7.2 Hz), 4.25 (1H, q, *J* = 7.2 Hz) [O-CH<sub>2</sub>CH<sub>3</sub>]; 3.92 (1H, dd, *J* = 9.6, 6.0 Hz), 3.50 (1H, dd, *J* = 13.6, 6.0 Hz), 3.20 (1H, dd, *J* = 13.6, 9.6 Hz), 1.29 (3H, t, *J* = 7.2 Hz, OCH<sub>2</sub>CH<sub>3</sub>); <sup>13</sup>C NMR (CDCl<sub>3</sub>, DEPT-135) δ 165.2 (C, O-C=O), 134.7 (C), 133.1 (CH), 131.7 (CH), 129.6 (CH), 127.9 (CH), 124.2 (C), 115.8 (C, C≡N), 63.0 (CH<sub>2</sub>, OCH<sub>2</sub>CH<sub>3</sub>), 37.4 (CH), 36.1 (CH<sub>2</sub>), 13.9 (CH<sub>3</sub>, OCH<sub>2</sub>CH<sub>3</sub>); LRMS *m/z* 280.00 (M - H<sup>+</sup>), calcd for C<sub>12</sub>H<sub>12</sub>BrNO<sub>2</sub> 281.0051; HRMS *m/z* 303.9937 (M + Na<sup>+</sup>), calcd for C<sub>12</sub>H<sub>12</sub>BrNO<sub>2</sub>Na 303.9949.

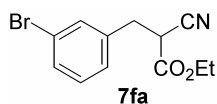

**3-(3-Bromo-phenyl)-2-cyano-propionic acid ethyl ester (7fa):** Purified by column chromatography using EtOAc/hexane and isolated as a liquid. IR (neat):  $\nu_{\max}$  3061, 2984, 2251 (C≡N), 1745 (O-C=O), 1597, 1570, 1072, 854 and 696

cm<sup>-1</sup>; <sup>1</sup>H NMR (CDCl<sub>3</sub>) δ 7.43 (2H, m), 7.23 (2H, m) [Ar-H]; 4.24 (2H, q, *J* = 7.2 Hz, OCH<sub>2</sub>CH<sub>3</sub>), 3.71 (1H, dd, *J* = 8.0, 6.0 Hz), 3.20 (2H, dABq, *J* = 14.0, 5.6 Hz), 1.30 (3H, t, *J* = 7.2 Hz, OCH<sub>2</sub>CH<sub>3</sub>); <sup>13</sup>C NMR (CDCl<sub>3</sub>, DEPT-135) δ 165.1 (C, O-C=O), 137.4 (C), 132.0 (CH), 130.9 (CH), 130.4 (CH), 127.7 (CH), 122.7 (C), 115.7 (C, C≡N), 63.0 (CH<sub>2</sub>, OCH<sub>2</sub>CH<sub>3</sub>), 39.2 (CH), 35.1 (CH<sub>2</sub>), 13.9 (CH<sub>3</sub>, OCH<sub>2</sub>CH<sub>3</sub>); LRMS *m/z* 282.00 (M + H<sup>+</sup>), calcd for C<sub>12</sub>H<sub>12</sub>BrNO<sub>2</sub> 281.0051; HRMS *m/z* 303.9938 (M + Na<sup>+</sup>), calcd for C<sub>12</sub>H<sub>12</sub>BrNO<sub>2</sub>Na 303.9949.

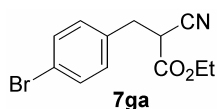

**3-(4-Bromo-phenyl)-2-cyano-propionic acid ethyl ester (7ga):** Purified by column chromatography using EtOAc/hexane and isolated as a white solid. IR (neat):  $\nu_{\max}$  2984, 2251 (C≡N), 1745 (O-C=O), 1593, 1072, 854 and 619 cm<sup>-1</sup>; <sup>1</sup>H

NMR (CDCl<sub>3</sub>) δ 7.48 (2H, d, *J* = 8.0 Hz), 7.17 (2H, d, *J* = 7.6 Hz) [Ar-H]; 4.25 (2H, q, *J* = 7.2 Hz, OCH<sub>2</sub>CH<sub>3</sub>), 3.71 (1H, dd, *J* = 8.4, 6.0 Hz), 3.20 (2H, dABq, *J* = 14.0, 6.0 Hz), 1.29 (3H, t, *J* = 7.2 Hz, OCH<sub>2</sub>CH<sub>3</sub>); <sup>13</sup>C NMR (CDCl<sub>3</sub>, DEPT-135) δ 165.2 (C, O-C=O), 134.2 (C), 132.0 (2 x CH), 130.7 (2 x CH), 121.9 (C), 115.8 (C, C≡N), 63.0 (CH<sub>2</sub>, OCH<sub>2</sub>CH<sub>3</sub>), 39.3 (CH), 35.0 (CH<sub>2</sub>), 13.9 (CH<sub>3</sub>, OCH<sub>2</sub>CH<sub>3</sub>); LRMS *m/z* 279.95 (M - H<sup>+</sup>), calcd for C<sub>12</sub>H<sub>12</sub>BrNO<sub>2</sub> 281.0051; HRMS *m/z* 303.9962 (M + Na<sup>+</sup>), calcd for C<sub>12</sub>H<sub>12</sub>BrNO<sub>2</sub>Na 303.9949.

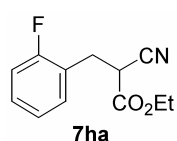

**2-Cyano-3-(2-fluoro-phenyl)-propionic acid ethyl ester (7ha):** Purified by column chromatography using EtOAc/hexane and isolated as a liquid. IR (neat):  $\nu_{\max}$  2986, 2253 (C≡N), 1745 (O-C=O), 1618, 1587, 1493, 1033, 702 and 640 cm<sup>-1</sup>; <sup>1</sup>H NMR

(CDCl<sub>3</sub>) δ 7.30 (2H, m), 7.12 (1H, bt, *J* = 7.6 Hz), 7.07 (1H, bt, *J* = 8.6 Hz) [Ar-H]; 4.24 (2H, q, *J* = 7.2 Hz, OCH<sub>2</sub>CH<sub>3</sub>), 3.80 (1H, dd, *J* = 8.8, 6.4 Hz), 3.37 (1H, dd, *J* = 14.0, 6.4 Hz), 3.19 (1H, dd, *J* = 13.6,

8.8 Hz), 1.27 (3H, t,  $J = 7.2$  Hz,  $\text{OCH}_2\text{CH}_3$ );  $^{13}\text{C}$  NMR ( $\text{CDCl}_3$ , DEPT-135)  $\delta$  165.2 (C, O-C=O), 161.0 (C, d,  $J = 244.8$  Hz, C-F), 131.4 (CH, d,  $J = 4.0$  Hz), 129.7 (CH, d,  $J = 8.2$  Hz), 124.4 (CH, d,  $J = 3.7$  Hz), 122.3 (C, d,  $J = 15.2$  Hz), 115.8 (C,  $\text{C}\equiv\text{N}$ ), 115.5 (CH, d,  $J = 21.4$  Hz), 62.9 ( $\text{CH}_2$ ,  $\text{OCH}_2\text{CH}_3$ ), 37.9 (CH, d,  $J = 6.4$  Hz), 29.5 ( $\text{CH}_2$ , d,  $J = 10.0$  Hz), 13.8 ( $\text{CH}_3$ ,  $\text{OCH}_2\text{CH}_3$ ); LRMS  $m/z$  220.00 ( $\text{M} - \text{H}^+$ ), calcd for  $\text{C}_{12}\text{H}_{12}\text{FNO}_2$  221.0852; HRMS  $m/z$  222.0924 ( $\text{M} + \text{H}^+$ ), calcd for  $\text{C}_{12}\text{H}_{12}\text{FNO}_2\text{H}$  222.0930.

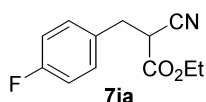

**2-Cyano-3-(4-fluoro-phenyl)-propionic acid ethyl ester (7ia):** Purified by column chromatography using EtOAc/hexane and isolated as a liquid. IR (neat):  $\nu_{\text{max}}$  2986, 2253 ( $\text{C}\equiv\text{N}$ ), 1747 (O-C=O), 1602, 1512, 1224, 1028, 841 and 707

$\text{cm}^{-1}$ ;  $^1\text{H}$  NMR ( $\text{CDCl}_3$ )  $\delta$  7.25 (2H, m), 7.02 (2H, t,  $J = 8.4$  Hz) [Ar-H]; 4.23 (2H, q,  $J = 7.2$  Hz,  $\text{OCH}_2\text{CH}_3$ ), 3.69 (1H, dd,  $J = 8.0, 6.0$  Hz), 3.21 (2H, dABq,  $J = 14.0, 5.6$  Hz), 1.27 (3H, t,  $J = 7.2$  Hz,  $\text{OCH}_2\text{CH}_3$ );  $^{13}\text{C}$  NMR ( $\text{CDCl}_3$ , DEPT-135)  $\delta$  165.3 (C, O-C=O), 162.3 (C, d,  $J = 245.0$  Hz, C-F), 130.9 (C, d,  $J = 3.3$  Hz), 130.7 (2 x CH, d,  $J = 8.2$  Hz), 115.9 (C,  $\text{C}\equiv\text{N}$ ), 115.7 (2 x CH, d,  $J = 21.4$  Hz), 62.9 ( $\text{CH}_2$ ,  $\text{OCH}_2\text{CH}_3$ ), 39.6 (CH), 34.8 ( $\text{CH}_2$ ), 13.9 ( $\text{CH}_3$ ,  $\text{OCH}_2\text{CH}_3$ ); LRMS  $m/z$  220.00 ( $\text{M} - \text{H}^+$ ), calcd for  $\text{C}_{12}\text{H}_{12}\text{FNO}_2$  221.0852; HRMS  $m/z$  244.0746 ( $\text{M} + \text{Na}^+$ ), calcd for  $\text{C}_{12}\text{H}_{12}\text{FNO}_2\text{Na}$  244.0750.

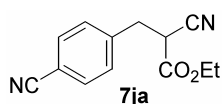

**2-Cyano-3-(4-cyano-phenyl)-propionic acid ethyl ester (7ja):** Purified by column chromatography using EtOAc/hexane and isolated as a white solid. IR (neat):  $\nu_{\text{max}}$  2986, 2227 ( $\text{C}\equiv\text{N}$ ), 1724 (O-C=O), 1610, 1506, 1317, 1230, 1041,

839, 652 and 545  $\text{cm}^{-1}$ ;  $^1\text{H}$  NMR ( $\text{CDCl}_3$ )  $\delta$  7.64 (2H, d,  $J = 8.0$  Hz), 7.40 (2H, d,  $J = 8.4$  Hz) [Ar-H]; 4.24 (2H, q,  $J = 7.2$  Hz,  $\text{OCH}_2\text{CH}_3$ ), 3.75 (1H, dd,  $J = 8.0, 6.0$  Hz), 3.29 (2H, dABq,  $J = 14.0, 5.6$  Hz), 1.27 (3H, t,  $J = 7.2$  Hz,  $\text{OCH}_2\text{CH}_3$ );  $^{13}\text{C}$  NMR ( $\text{CDCl}_3$ , DEPT-135)  $\delta$  164.8 (C, O-C=O), 132.5 (2 x CH), 129.9 (2 x CH), 118.3 (C), 115.5 (C,  $\text{C}\equiv\text{N}$ ), 111.9 (C,  $\text{C}\equiv\text{N}$ ), 63.2 ( $\text{CH}_2$ ,  $\text{OCH}_2\text{CH}_3$ ), 38.8 (CH), 35.3 ( $\text{CH}_2$ ), 13.9 ( $\text{CH}_3$ ,  $\text{OCH}_2\text{CH}_3$ ); LRMS  $m/z$  227.00 ( $\text{M} - \text{H}^+$ ), calcd for  $\text{C}_{13}\text{H}_{12}\text{N}_2\text{O}_2$  228.0899; HRMS  $m/z$  251.0799 ( $\text{M} + \text{Na}^+$ ), calcd for  $\text{C}_{13}\text{H}_{12}\text{N}_2\text{O}_2\text{Na}$  251.0796.

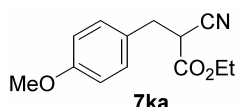

**2-Cyano-3-(4-methoxy-phenyl)-propionic acid ethyl ester (7ka):** Purified by column chromatography using EtOAc/hexane and isolated as a liquid. IR (neat):  $\nu_{\text{max}}$  2986, 2251 ( $\text{C}\equiv\text{N}$ ), 1745 (O-C=O), 1612, 1514, 1032, 837 and 707

$\text{cm}^{-1}$ ;  $^1\text{H}$  NMR ( $\text{CDCl}_3$ )  $\delta$  7.18 (2H, d,  $J = 8.4$  Hz), 6.86 (2H, d,  $J = 8.4$  Hz) [Ar-H]; 4.22 (2H, q,  $J = 6.8$  Hz,  $\text{OCH}_2\text{CH}_3$ ), 3.78 (3H, s,  $\text{OCH}_3$ ), 3.67 (1H, dd,  $J = 8.0, 6.0$  Hz), 3.17 (2H, dABq,  $J = 13.6, 5.6$  Hz), 1.26 (3H, t,  $J = 7.2$  Hz,  $\text{OCH}_2\text{CH}_3$ );  $^{13}\text{C}$  NMR ( $\text{CDCl}_3$ , DEPT-135)  $\delta$  165.6 (C, O-C=O), 159.2 (C), 130.1 (2 x CH), 127.3 (C), 116.3 (C,  $\text{C}\equiv\text{N}$ ), 114.2 (2 x CH), 62.8 ( $\text{CH}_2$ ,  $\text{OCH}_2\text{CH}_3$ ), 55.2 ( $\text{CH}_3$ ,  $\text{OCH}_3$ ), 39.9 (CH), 35.0 ( $\text{CH}_2$ ), 13.9 ( $\text{CH}_3$ ,  $\text{OCH}_2\text{CH}_3$ ); LRMS  $m/z$  232.10 ( $\text{M} - \text{H}^+$ ), calcd for  $\text{C}_{13}\text{H}_{15}\text{NO}_3$  233.1052; HRMS  $m/z$  256.0956 ( $\text{M} + \text{Na}^+$ ), calcd for  $\text{C}_{13}\text{H}_{15}\text{NO}_3\text{Na}$  256.0950.

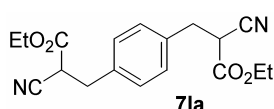

**2-Cyano-3-[4-(2-cyano-2-ethoxycarbonyl-ethyl)-phenyl]-propionic acid ethyl ester (7la):** Purified by column chromatography using EtOAc/hexane and isolated as a white solid. IR (neat):  $\nu_{\text{max}}$  2986, 2251 ( $\text{C}\equiv\text{N}$ ), 1747 (O-

C=O), 1518, 1446, 1028, 856 and 802  $\text{cm}^{-1}$ ;  $^1\text{H}$  NMR ( $\text{CDCl}_3$ )  $\delta$  7.24 (4H, s, Ar-H), 4.21 (4H, q,  $J = 7.2$  Hz, 2 x  $\text{OCH}_2\text{CH}_3$ ); 3.71 (2H, t,  $J = 8.0$  Hz, 2 x  $\text{HCCNCO}_2\text{Et}$ ), 3.20 (4H, dABq,  $J = 13.6, 5.6$  Hz), 1.25 (6H, t,  $J = 7.2$  Hz, 2 x  $\text{OCH}_2\text{CH}_3$ );  $^{13}\text{C}$  NMR ( $\text{CDCl}_3$ , DEPT-135)  $\delta$  165.3 (2 x C, O-C=O), 134.7

(2 x C), 129.4 (4 x CH), 115.9 (2 x C, C≡N), 62.8 (2 x CH<sub>2</sub>, OCH<sub>2</sub>CH<sub>3</sub>), 39.36 (CH), 39.34 (CH), 35.1 (2 x CH<sub>2</sub>), 13.8 (2 x CH<sub>3</sub>, OCH<sub>2</sub>CH<sub>3</sub>); LRMS m/z 327.10 (M - H<sup>+</sup>), calcd for C<sub>18</sub>H<sub>20</sub>N<sub>2</sub>O<sub>4</sub> 328.1423; HRMS m/z 351.1315 (M + Na<sup>+</sup>), calcd for C<sub>18</sub>H<sub>20</sub>N<sub>2</sub>O<sub>4</sub>Na 351.1321.

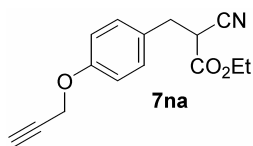

**2-Cyano-3-(4-prop-2-ynoxy-phenyl)-propionic acid ethyl ester (7na):**

Purified by column chromatography using EtOAc/hexane and isolated as a white solid. IR (neat):  $\nu_{\max}$  3285, 2984, 2247 (C≡N), 1739 (O-C=O), 1610, 1512, 1026, 925 and 646 cm<sup>-1</sup>; <sup>1</sup>H NMR (CDCl<sub>3</sub>)  $\delta$  7.23 (2H, d,  $J$  = 8.4 Hz), 6.96 (2H, d,  $J$  = 8.8 Hz) [Ar-*H*]; 4.70 (2H, d,  $J$  = 2.4 Hz, OCH<sub>2</sub>CCH), 4.25 (2H, q,  $J$  = 6.8 Hz, OCH<sub>2</sub>CH<sub>3</sub>), 3.70 (1H, dd,  $J$  = 8.4, 6.0 Hz), 3.21 (2H, dABq,  $J$  = 14.0, 5.6 Hz), 2.54 (1H, t,  $J$  = 2.4 Hz), 1.29 (3H, t,  $J$  = 7.2 Hz, OCH<sub>2</sub>CH<sub>3</sub>); <sup>13</sup>C NMR (CDCl<sub>3</sub>, DEPT-135)  $\delta$  165.5 (C, O-C=O), 157.1 (C), 130.1 (2 x CH), 128.2 (C), 116.2 (C, C≡N), 115.2 (2 x CH), 78.4 (C), 75.6 (CH), 62.9 (CH<sub>2</sub>, OCH<sub>2</sub>CCH), 55.7 (CH<sub>2</sub>, OCH<sub>2</sub>CH<sub>3</sub>), 39.8 (CH), 34.9 (CH<sub>2</sub>), 13.9 (CH<sub>3</sub>, OCH<sub>2</sub>CH<sub>3</sub>); LRMS m/z 256.15 (M - H<sup>+</sup>), calcd for C<sub>15</sub>H<sub>15</sub>NO<sub>3</sub> 257.1052; HRMS m/z 280.0950 (M + Na<sup>+</sup>), calcd for C<sub>15</sub>H<sub>15</sub>NO<sub>3</sub>Na 280.0950.

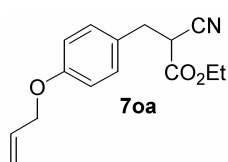

**3-(4-Allyloxy-phenyl)-2-cyano-propionic acid ethyl ester (7oa):**

Purified by column chromatography using EtOAc/hexane and isolated as a liquid. IR (neat):  $\nu_{\max}$  3086, 2988, 2251 (C≡N), 1745 (O-C=O), 1649, 1589, 1369, 1024, 931, 835 and 742 cm<sup>-1</sup>; <sup>1</sup>H NMR (CDCl<sub>3</sub>)  $\delta$  7.20 (2H, d,  $J$  = 8.5 Hz), 6.90 (2H, d,  $J$  = 8.5 Hz) [Ar-*H*]; 6.07 (1H, m), 5.42 (1H, dd,  $J$  = 17.2, 1.4 Hz), 5.30 (1H, dd,  $J$  = 10.4, 1.2 Hz) [OCH<sub>2</sub>CH=CH<sub>2</sub>]; 4.54 (2H, d,  $J$  = 5.2 Hz, OCH<sub>2</sub>CH=CH<sub>2</sub>), 4.25 (2H, q,  $J$  = 7.1 Hz, OCH<sub>2</sub>CH<sub>3</sub>), 3.69 (1H, dd,  $J$  = 8.1, 5.8 Hz), 3.20 (2H, dABq,  $J$  = 13.9, 5.8 Hz), 1.29 (3H, t,  $J$  = 7.1 Hz, OCH<sub>2</sub>CH<sub>3</sub>); <sup>13</sup>C NMR (CDCl<sub>3</sub>, DEPT-135)  $\delta$  165.6 (C, O-C=O), 158.2 (C), 133.1 (CH, OCH<sub>2</sub>CH=CH<sub>2</sub>), 130.1 (2 x CH), 127.4 (C), 117.7 (CH<sub>2</sub>, OCH<sub>2</sub>CH=CH<sub>2</sub>), 116.3 (C, C≡N), 115.0 (2 x CH), 68.8 (CH<sub>2</sub>, OCH<sub>2</sub>CH=CH<sub>2</sub>), 62.9 (CH<sub>2</sub>, OCH<sub>2</sub>CH<sub>3</sub>), 39.9 (CH), 35.1 (CH<sub>2</sub>), 13.9 (CH<sub>3</sub>, OCH<sub>2</sub>CH<sub>3</sub>); LRMS m/z 260.20 (M + H<sup>+</sup>), calcd for C<sub>15</sub>H<sub>17</sub>NO<sub>3</sub> 259.1208.

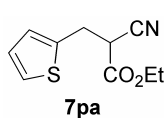

**2-Cyano-3-thiophen-2-yl-propionic acid ethyl ester (7pa):**

Purified by column chromatography using EtOAc/hexane and isolated as a liquid. IR (neat):  $\nu_{\max}$  3088, 2984, 2251 (C≡N), 1745 (O-C=O), 1593, 1261, 858, 713 and 596 cm<sup>-1</sup>; <sup>1</sup>H NMR (CDCl<sub>3</sub>)  $\delta$  7.23 (1H, d,  $J$  = 4.8 Hz), 7.00 (1H, m), 6.97 (1H, t,  $J$  = 4.0 Hz) [Ar-*H*]; 4.26 (2H, q,  $J$  = 7.2 Hz, OCH<sub>2</sub>CH<sub>3</sub>), 3.76 (1H, t,  $J$  = 6.0 Hz), 3.47 (2H, m), 1.29 (3H, t,  $J$  = 7.6 Hz, OCH<sub>2</sub>CH<sub>3</sub>); <sup>13</sup>C NMR (CDCl<sub>3</sub>, DEPT-135)  $\delta$  165.0 (C, O-C=O), 136.6 (C), 127.3 (CH), 127.2 (CH), 125.3 (CH), 115.8 (C, C≡N), 63.1 (CH<sub>2</sub>, OCH<sub>2</sub>CH<sub>3</sub>), 39.8 (CH), 29.9 (CH<sub>2</sub>), 13.9 (CH<sub>3</sub>, OCH<sub>2</sub>CH<sub>3</sub>); LRMS m/z 208.05 (M - H<sup>+</sup>), calcd for C<sub>10</sub>H<sub>11</sub>NO<sub>2</sub>S 209.0510; HRMS m/z 232.0405 (M + Na<sup>+</sup>), calcd for C<sub>10</sub>H<sub>11</sub>NO<sub>2</sub>SNa 232.0408.

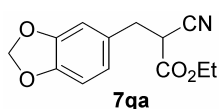

**3-Benzo[1,3]dioxol-5-yl-2-cyano-propionic acid ethyl ester (7qa):**

Purified by column chromatography using EtOAc/hexane and isolated as a liquid. IR (neat):  $\nu_{\max}$  2984, 2251 (C≡N), 1743 (O-C=O), 1610, 1249, 1037 and 810 cm<sup>-1</sup>; <sup>1</sup>H NMR (CDCl<sub>3</sub>)  $\delta$  6.74 (3H, m, Ar-*H*), 5.94 (2H, s), 4.23 (2H, q,  $J$  = 7.2 Hz, OCH<sub>2</sub>CH<sub>3</sub>), 3.66 (1H, dd,  $J$  = 8.0, 6.0 Hz), 3.14 (2H, dABq,  $J$  = 14.0, 6.0 Hz), 1.27 (3H, t,  $J$  = 7.2 Hz, OCH<sub>2</sub>CH<sub>3</sub>); <sup>13</sup>C NMR

(CDCl<sub>3</sub>, DEPT-135)  $\delta$  165.4 (C, O-C=O), 147.9 (C), 147.1 (C), 128.8 (C), 122.3 (CH), 116.0 (C, C $\equiv$ N), 109.2 (CH), 108.4 (CH), 101.2 (CH<sub>2</sub>), 62.9 (CH<sub>2</sub>, OCH<sub>2</sub>CH<sub>3</sub>), 39.8 (CH), 35.5 (CH<sub>2</sub>), 13.9 (CH<sub>3</sub>, OCH<sub>2</sub>CH<sub>3</sub>); LRMS *m/z* 245.95 (M - H<sup>+</sup>), calcd for C<sub>13</sub>H<sub>13</sub>NO<sub>4</sub> 247.0845.

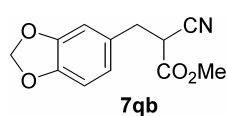

**7qb**

**3-Benzo[1,3]dioxol-5-yl-2-cyano-propionic acid methyl ester (7qb):** Purified by column chromatography using EtOAc/hexane and isolated as a liquid. IR (neat):  $\nu_{\max}$  2957, 2251 (C $\equiv$ N), 1751 (O-C=O), 1608, 1493, 1251, 1039, 929, 812 and 661 cm<sup>-1</sup>; <sup>1</sup>H NMR (CDCl<sub>3</sub>)  $\delta$  6.74 (3H, m, Ar-*H*), 5.95 (2H, s), 3.79 (3H, s, OCH<sub>3</sub>), 3.69 (1H, dd, *J* = 8.0, 6.0 Hz), 3.15 (2H, dABq, *J* = 14.0, 6.0 Hz); <sup>13</sup>C NMR (CDCl<sub>3</sub>, DEPT-135)  $\delta$  165.9 (C, O-C=O), 147.9 (C), 147.2 (C), 128.7 (C), 122.3 (CH), 115.9 (C, C $\equiv$ N), 109.2 (CH), 108.5 (CH), 101.1 (CH<sub>2</sub>), 53.5 (CH<sub>3</sub>, OCH<sub>3</sub>), 39.7 (CH), 35.5 (CH<sub>2</sub>); LRMS *m/z* 233.95 (M + H<sup>+</sup>), calcd for C<sub>12</sub>H<sub>11</sub>NO<sub>4</sub> 233.0688.

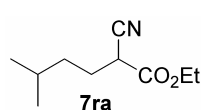

**7ra**

**2-Cyano-5-methyl-hexanoic acid ethyl ester (7ra):** Purified by column chromatography using EtOAc/hexane and isolated as a liquid. IR (neat):  $\nu_{\max}$  2961, 2251 (C $\equiv$ N), 1747 (O-C=O), 1469, 1257, 912, 856 and 750 cm<sup>-1</sup>; <sup>1</sup>H NMR (CDCl<sub>3</sub>)  $\delta$  4.27 (2H, q, *J* = 7.2 Hz, OCH<sub>2</sub>CH<sub>3</sub>), 3.46 (1H, t, *J* = 6.4 Hz), 1.95 (2H, m), 1.61 (1H, m), 1.35 (2H, m), 1.33 (3H, t, *J* = 7.2 Hz, OCH<sub>2</sub>CH<sub>3</sub>), 0.92 (3H, d, *J* = 6.8 Hz, CH<sub>3</sub>), 0.92 (3H, d, *J* = 6.8 Hz, CH<sub>3</sub>) [CH(CH<sub>3</sub>)<sub>2</sub>]; <sup>13</sup>C NMR (CDCl<sub>3</sub>, DEPT-135)  $\delta$  166.2 (C, O-C=O), 116.6 (C, C $\equiv$ N), 62.7 (CH<sub>2</sub>, OCH<sub>2</sub>CH<sub>3</sub>), 37.8 (CH), 35.7 (CH<sub>2</sub>), 27.9 (CH<sub>2</sub>), 27.5 (CH), 22.3 (CH<sub>3</sub>), 22.1 (CH<sub>3</sub>), 14.0 (CH<sub>3</sub>, OCH<sub>2</sub>CH<sub>3</sub>); LRMS *m/z* 182.00 (M - H<sup>+</sup>), calcd for C<sub>10</sub>H<sub>17</sub>NO<sub>2</sub> 183.1259; HRMS *m/z* 206.1161 (M + Na<sup>+</sup>), calcd for C<sub>10</sub>H<sub>17</sub>NO<sub>2</sub>Na 206.1157.

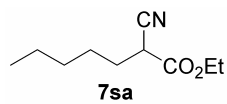

**7sa**

**2-Cyano-heptanoic acid ethyl ester (7sa):** Purified by column chromatography using EtOAc/hexane and isolated as a liquid. IR (neat):  $\nu_{\max}$  2961, 2249 (C $\equiv$ N), 1747 (O-C=O), 1466, 1371, 1203, 1030, 856 and 748 cm<sup>-1</sup>; <sup>1</sup>H NMR (CDCl<sub>3</sub>)  $\delta$  4.24 (2H, q, *J* = 7.2 Hz, OCH<sub>2</sub>CH<sub>3</sub>), 3.46 (1H, t, *J* = 6.8 Hz), 1.91 (2H, q, *J* = 8.0 Hz), 1.47 (2H, m), 1.30 (7H, m), 0.88 (3H, t, *J* = 6.8 Hz, OCH<sub>2</sub>CH<sub>3</sub>); <sup>13</sup>C NMR (CDCl<sub>3</sub>, DEPT-135)  $\delta$  166.2 (C, O-C=O), 116.6 (C, C $\equiv$ N), 62.7 (CH<sub>2</sub>, OCH<sub>2</sub>CH<sub>3</sub>), 37.6 (CH), 30.9 (CH<sub>2</sub>), 29.8 (CH<sub>2</sub>), 26.4 (CH<sub>2</sub>), 22.2 (CH<sub>2</sub>), 14.0 (CH<sub>3</sub>), 13.8 (CH<sub>3</sub>); LRMS *m/z* 182.00 (M - H<sup>+</sup>), calcd for C<sub>10</sub>H<sub>17</sub>NO<sub>2</sub> 183.1259; HRMS *m/z* 206.1158 (M + Na<sup>+</sup>), calcd for C<sub>10</sub>H<sub>17</sub>NO<sub>2</sub>Na 206.1157.

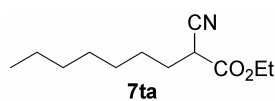

**7ta**

**2-Cyano-nonanoic acid ethyl ester (7ta):** Purified by column chromatography using EtOAc/hexane and isolated as a liquid. IR (neat):  $\nu_{\max}$  2934, 2251 (C $\equiv$ N), 1747 (O-C=O), 1466, 1030, 856 and 750 cm<sup>-1</sup>; <sup>1</sup>H NMR (CDCl<sub>3</sub>)  $\delta$  4.26 (2H, q, *J* = 7.1 Hz, OCH<sub>2</sub>CH<sub>3</sub>), 3.47 (1H, t, *J* = 6.9 Hz), 1.93 (2H, q, *J* = 8.0 Hz), 1.50 (2H, m), 1.31 (11H, m), 0.88 (3H, t, *J* = 6.4 Hz, CH<sub>3</sub>); <sup>13</sup>C NMR (CDCl<sub>3</sub>, DEPT-135)  $\delta$  166.2 (C, O-C=O), 116.6 (C, C $\equiv$ N), 62.7 (CH<sub>2</sub>, OCH<sub>2</sub>CH<sub>3</sub>), 37.6 (CH), 31.6 (CH<sub>2</sub>), 29.9 (CH<sub>2</sub>), 28.8 (CH<sub>2</sub>), 28.7 (CH<sub>2</sub>), 26.8 (CH<sub>2</sub>), 22.5 (CH<sub>2</sub>), 14.01 (CH<sub>3</sub>), 13.99 (CH<sub>3</sub>); LRMS *m/z* 212.20 (M + H<sup>+</sup>), calcd for C<sub>12</sub>H<sub>21</sub>NO<sub>2</sub> 211.1572; HRMS *m/z* 234.1467 (M + Na<sup>+</sup>), calcd for C<sub>12</sub>H<sub>21</sub>NO<sub>2</sub>Na 234.1470.

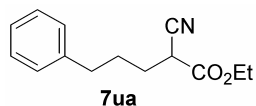

**7ua**

**2-Cyano-5-phenyl-pentanoic acid ethyl ester (7ua):** Purified by column chromatography using EtOAc/hexane and isolated as a liquid. IR (neat):  $\nu_{\max}$  3063, 2934, 2251 (C $\equiv$ N),

1749 (O-C=O), 1602, 1496, 1026, 854 and 700  $\text{cm}^{-1}$ ;  $^1\text{H}$  NMR ( $\text{CDCl}_3$ )  $\delta$  7.31 (2H, m), 7.22 (3H, m) [Ar-H]; 4.27 (2H, q,  $J = 7.2$  Hz,  $\text{OCH}_2\text{CH}_3$ ), 3.51 (1H, t,  $J = 6.8$  Hz), 2.71 (2H, t,  $J = 7.6$  Hz), 1.99 (2H, m), 1.87 (2H, m), 1.33 (3H, t,  $J = 7.2$  Hz,  $\text{OCH}_2\text{CH}_3$ );  $^{13}\text{C}$  NMR ( $\text{CDCl}_3$ , DEPT-135)  $\delta$  166.0 (C, O-C=O), 140.8 (C), 128.5 (2 x CH), 128.3 (2 x CH), 126.1 (CH), 116.4 (C,  $\text{C}\equiv\text{N}$ ), 62.8 ( $\text{CH}_2$ ,  $\text{OCH}_2\text{CH}_3$ ), 37.4 (CH), 34.9 ( $\text{CH}_2$ ), 29.3 ( $\text{CH}_2$ ), 28.3 ( $\text{CH}_2$ ), 13.9 ( $\text{CH}_3$ ,  $\text{OCH}_2\text{CH}_3$ ); LRMS  $m/z$  230.10 ( $\text{M} - \text{H}^+$ ), calcd for  $\text{C}_{14}\text{H}_{17}\text{NO}_2$  231.1259; HRMS  $m/z$  254.1157 ( $\text{M} + \text{Na}^+$ ), calcd for  $\text{C}_{14}\text{H}_{17}\text{NO}_2\text{Na}$  254.1157.

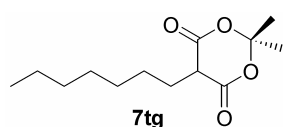

7tg

**5-Heptyl-2,2-dimethyl-[1,3]dioxane-4,6-dione(7tg):** Purified by column chromatography using EtOAc/hexane and isolated as a white solid. IR (neat):  $\nu_{\text{max}}$  2928, 1747 (O-C=O), 1458, 1358, 985 and 927  $\text{cm}^{-1}$ ;  $^1\text{H}$  NMR ( $\text{CDCl}_3$ )  $\delta$  3.49 (1H, t,  $J = 4.8$  Hz), 2.09 (2H, m), 1.77 (3H, s,  $\text{CH}_3$ ), 1.75

(3H, s,  $\text{CH}_3$ ), 1.43-1.25 (10H, m), 0.87 (3H, t,  $J = 6.4$  Hz);  $^{13}\text{C}$  NMR ( $\text{CDCl}_3$ , DEPT-135)  $\delta$  165.7 (2 x C, O-C=O), 104.8 (C, O-C-O), 46.1 (CH), 31.7 ( $\text{CH}_2$ ), 29.4 ( $\text{CH}_2$ ), 28.9 ( $\text{CH}_2$ ), 28.4 ( $\text{CH}_3$ ), 26.9 ( $\text{CH}_3$ ), 26.7 ( $\text{CH}_2$ ), 26.5 ( $\text{CH}_2$ ), 22.6 ( $\text{CH}_2$ ), 14.0 ( $\text{CH}_3$ ); LRMS  $m/z$  241.05 ( $\text{M} - \text{H}^+$ ), calcd for  $\text{C}_{13}\text{H}_{22}\text{O}_4$  242.1518; HRMS  $m/z$  265.1411 ( $\text{M} + \text{Na}^+$ ), calcd for  $\text{C}_{13}\text{H}_{22}\text{O}_4\text{Na}$  265.1416.

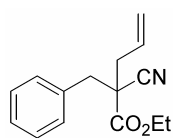

10aac

**2-Benzyl-2-cyano-pent-4-enoic acid ethyl ester (10aac):** Purified by column chromatography using EtOAc/hexane and isolated as a liquid. IR (neat):  $\nu_{\text{max}}$  2984, 2245 ( $\text{C}\equiv\text{N}$ ), 1739 (O-C=O), 1643 (C=C), 1496, 1095, 929, 769 and 702  $\text{cm}^{-1}$ ;  $^1\text{H}$  NMR ( $\text{CDCl}_3$ )  $\delta$  7.30 (5H, m, Ar-H), 5.83 (1H, m,  $\text{CH}=\text{CH}_2$ ), 5.27 (2H, m,  $\text{CH}=\text{CH}_2$ ), 4.15 (2H, m,  $\text{OCH}_2\text{CH}_3$ ), 3.13 (2H, ABq,  $J = 12.0$  Hz), 2.75 (1H, dd,  $J = 12.0, 8.0$  Hz), 2.58

(1H, dd,  $J = 12.0, 8.0$  Hz), 1.16 (3H, t,  $J = 8.0$  Hz,  $\text{OCH}_2\text{CH}_3$ );  $^{13}\text{C}$  NMR ( $\text{CDCl}_3$ , DEPT-135)  $\delta$  168.0 (C, O-C=O), 134.1 (C), 130.6 (CH), 129.9 (2 x CH), 128.6 (2 x CH), 127.9 (CH), 120.9 ( $\text{CH}_2$ ), 118.6 (C,  $\text{C}\equiv\text{N}$ ), 62.7 ( $\text{CH}_2$ ,  $\text{OCH}_2\text{CH}_3$ ), 51.2 (C), 42.6 ( $\text{CH}_2$ ), 41.4 ( $\text{CH}_2$ ), 13.9 ( $\text{CH}_3$ ,  $\text{OCH}_2\text{CH}_3$ ); LRMS  $m/z$  244.20 ( $\text{M} + \text{H}^+$ ), calcd for  $\text{C}_{15}\text{H}_{17}\text{NO}_2$  243.1259; HRMS  $m/z$  266.1153 ( $\text{M} + \text{Na}^+$ ), calcd for  $\text{C}_{15}\text{H}_{17}\text{NO}_2\text{Na}$  266.1157.

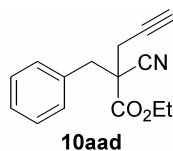

10aad

**2-Benzyl-2-cyano-pent-4-ynoic acid ethyl ester (10aad):** Purified by column chromatography using EtOAc/hexane and isolated as a liquid. IR (neat):  $\nu_{\text{max}}$  3290, 3065, 2984, 2249 ( $\text{C}\equiv\text{N}$ ), 1743 (O-C=O), 1604, 1084, 744 and 702  $\text{cm}^{-1}$ ;  $^1\text{H}$  NMR ( $\text{CDCl}_3$ )  $\delta$  7.33 (5H, m, Ar-H), 4.23 (2H, m,  $\text{OCH}_2\text{CH}_3$ ), 3.27 (2H, br s,  $\text{CH}_2\text{C}\equiv\text{CH}$ ),

2.80 (2H, dABq,  $J = 16.8, 2.4$  Hz), 2.29 (1H, t,  $J = 2.8$  Hz,  $\text{C}\equiv\text{CH}$ ), 1.23 (3H, t,  $J = 7.2$  Hz,  $\text{OCH}_2\text{CH}_3$ );  $^{13}\text{C}$  NMR ( $\text{CDCl}_3$ , DEPT-135)  $\delta$  167.0 (C, O-C=O), 133.3 (C), 129.9 (2 x CH), 128.6 (2 x CH), 128.0 (CH), 117.9 (C,  $\text{C}\equiv\text{N}$ ), 76.9 (C,  $\text{C}\equiv\text{CH}$ ), 73.4 (CH,  $\text{C}\equiv\text{CH}$ ), 63.1 ( $\text{CH}_2$ ,  $\text{OCH}_2\text{CH}_3$ ), 49.8 (C), 41.3 ( $\text{CH}_2$ ), 26.4 ( $\text{CH}_2$ ), 13.8 ( $\text{CH}_3$ ,  $\text{OCH}_2\text{CH}_3$ ); LRMS  $m/z$  242.05 ( $\text{M} + \text{H}^+$ ), calcd for  $\text{C}_{15}\text{H}_{15}\text{NO}_2$  241.1103; HRMS  $m/z$  264.1003 ( $\text{M} + \text{Na}^+$ ), calcd for  $\text{C}_{15}\text{H}_{15}\text{NO}_2\text{Na}$  264.1000.

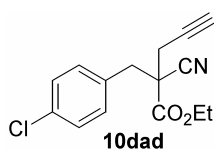

10dad

**2-(4-Chloro-benzyl)-2-cyano-pent-4-ynoic acid ethyl ester (10dad):** Purified by column chromatography using EtOAc/hexane and isolated as a white solid. IR (neat):  $\nu_{\text{max}}$  3065, 2986, 2301 ( $\text{C}\equiv\text{C}$ ), 2247 ( $\text{C}\equiv\text{N}$ ), 1743 (O-C=O), 1599, 1493, 1228, 1093 and 734  $\text{cm}^{-1}$ ;  $^1\text{H}$  NMR ( $\text{CDCl}_3$ )  $\delta$  7.28 (2H, d,  $J = 8.4$  Hz), 7.23 (2H, d,  $J = 8.4$  Hz) [Ar-H]; 4.21 (2H, m,  $\text{OCH}_2\text{CH}_3$ ), 3.22 (2H, br s), 2.79 (2H, dABq,  $J = 16.4, 2.0$  Hz),

2.28 (1H, br s,  $\text{CH}_2\text{C}\equiv\text{CH}$ ), 1.24 (3H, t,  $J = 6.8$  Hz,  $\text{OCH}_2\text{CH}_3$ );  $^{13}\text{C}$  NMR ( $\text{CDCl}_3$ , DEPT-135)  $\delta$  166.9



(C, O=C=O), 134.2 (C), 131.9 (C), 131.3 (2 x CH), 128.9 (2 x CH), 117.7 (C, C≡N), 76.6 (C, CH<sub>2</sub>C≡CH), 73.8 (CH, CH<sub>2</sub>C≡CH), 63.3 (CH<sub>2</sub>, OCH<sub>2</sub>CH<sub>3</sub>), 49.7 (C), 40.5 (CH<sub>2</sub>), 26.6 (CH<sub>2</sub>), 13.9 (CH<sub>3</sub>, OCH<sub>2</sub>CH<sub>3</sub>); LRMS m/z 276.15 (M + H<sup>+</sup>), calcd for C<sub>15</sub>H<sub>14</sub>ClNO<sub>2</sub> 275.0713.

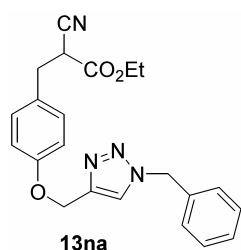

**13na**  
**3-[4-(1-Benzyl-1H-[1,2,3]triazol-4-yloxy)-phenyl]-2-cyano-propionic acid ethyl ester (13na):** Purified by column chromatography using EtOAc/hexane and isolated as a gummy oil. IR (neat):  $\nu_{\max}$  3140, 2928, 2251 (C≡N), 1743 (O=C=O), 1601, 1456, 1249, 1049 and 723 cm<sup>-1</sup>; <sup>1</sup>H NMR (CDCl<sub>3</sub>)  $\delta$  7.54 (1H, s, olefinic-H), 7.37 (3H, m), 7.28 (2H, m), 7.18 (2H, m), 6.93 (2H, m) [Ar-H]; 5.53 (2H, bs), 5.16 (2H, bs), 4.23 (2H, q, *J* = 7.2 Hz, OCH<sub>2</sub>CH<sub>3</sub>), 3.69 (1H, dd, *J* = 8.2, 5.8 Hz), 3.18 (2H, dABq, *J* = 13.9, 5.7 Hz), 1.27 (3H, t, *J* = 7.2 Hz, OCH<sub>2</sub>CH<sub>3</sub>); <sup>13</sup>C NMR (CDCl<sub>3</sub>, DEPT-135)  $\delta$  165.5 (C, O=C=O), 157.8 (C), 144.4 (C), 134.5 (C), 130.2 (2 x CH), 129.1 (2 x CH), 128.8 (CH), 128.1 (2 x CH), 127.9 (C), 122.7 (CH), 114.2 (C, C≡N), 115.1 (2 x CH), 62.9 (CH<sub>2</sub>), 62.1 (CH<sub>2</sub>), 54.2 (CH<sub>2</sub>), 39.9 (CH), 35.0 (CH<sub>2</sub>), 13.9 (CH<sub>3</sub>, OCH<sub>2</sub>CH<sub>3</sub>); LRMS m/z 391.30 (M + H<sup>+</sup>), calcd for C<sub>22</sub>H<sub>22</sub>N<sub>4</sub>O<sub>3</sub> 390.1692.

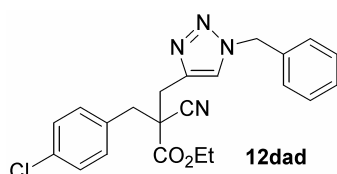

**12dad**  
**2-(1-Benzyl-1H-[1,2,3]triazol-4-ylmethyl)-3-(4-chloro-phenyl)-2-cyano-propionic acid ethyl ester (12dad):** Purified by column chromatography using EtOAc/hexane and isolated as a solid. IR (neat):  $\nu_{\max}$  3292, 2986, 2245 (C≡N), 1741 (O=C=O), 1595, 1493, 1236, 1095, 844 and 665 cm<sup>-1</sup>; <sup>1</sup>H NMR (CDCl<sub>3</sub>)  $\delta$  7.50 (1H, s), 7.40-7.23 (9H, m) [Ar-H]; 5.52 (2H, s, NCH<sub>2</sub>Ph), 4.09 (2H, q, *J* = 7.2 Hz, OCH<sub>2</sub>CH<sub>3</sub>), 3.41 (1H, d, *J* = 14.4 Hz), 3.28 (2H, ABq, *J* = 14.8 Hz), 3.12 (1H, d, *J* = 13.6 Hz), 1.09 (3H, t, *J* = 7.2 Hz, OCH<sub>2</sub>CH<sub>3</sub>); <sup>13</sup>C NMR (CDCl<sub>3</sub>, DEPT-135)  $\delta$  167.3 (C, O=C=O), 141.1 (C), 134.4 (C), 133.9 (C), 132.3 (C), 131.3 (2 x CH), 129.0 (2 x CH), 128.7 (2 x CH), 127.9 (2 x CH), 122.7 (CH), 118.3 (C, C≡N), 62.9 (CH<sub>2</sub>, OCH<sub>2</sub>CH<sub>3</sub>), 54.1 (CH<sub>2</sub>, NCH<sub>2</sub>Ph), 51.5 (C), 41.3 (CH<sub>2</sub>), 33.2 (CH<sub>2</sub>), 13.8 (CH<sub>3</sub>, OCH<sub>2</sub>CH<sub>3</sub>); LRMS m/z 409.10 (M + H<sup>+</sup>), calcd for C<sub>22</sub>H<sub>21</sub>ClN<sub>4</sub>O<sub>2</sub> 408.1353; Anal. calcd for C<sub>22</sub>H<sub>21</sub>ClN<sub>4</sub>O<sub>2</sub> (408.1353): C, 64.62; H, 5.18; N, 13.70. Found: C, 64.618; H, 5.176; N, 13.755%.

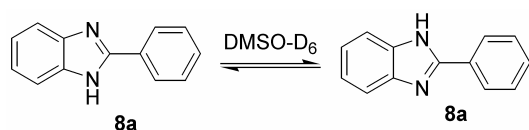

**8a**  
**2-Phenyl-1H-benzimidazole (8a):** Purified by column chromatography using EtOAc/hexane and isolated as a solid. IR (neat):  $\nu_{\max}$  3051, 1622, 1589, 1462, 1275, 1003, 740, 686 and 493 cm<sup>-1</sup>; <sup>1</sup>H NMR (DMSO-D<sub>6</sub>)  $\delta$  8.09 (2H, m), 7.68 (2H, br s), 7.51 (3H, m), 7.30 (3H, m); <sup>13</sup>C NMR (DMSO-D<sub>6</sub>, DEPT-135)  $\delta$  151.7 (C), 144.0 (C, broad peak), 135.0 (C, broad peak), 130.6 (C), 130.3 (CH), 129.4 (2 x CH), 126.9 (2 x CH), 122.7 (CH, broad peak), 122.3 (CH, broad peak), 119.3 (CH, broad peak), 111.7 (CH, broad peak).

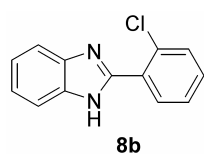

**8b**  
**2-(2-Chloro-phenyl)-1H-benzimidazole (8b):** Purified by column chromatography using EtOAc/hexane and isolated as a solid. IR (KBr):  $\nu_{\max}$  3050, 1626, 1491, 1442, 1230, 1122, 1053, 742, 652 and 428 cm<sup>-1</sup>; <sup>1</sup>H NMR (DMSO-D<sub>6</sub>)  $\delta$  7.91 (2H, br s), 7.66 (2H, br s), 7.45 (2H, br s), 7.25 (2H, br s); <sup>13</sup>C NMR (DMSO-D<sub>6</sub>, DEPT-135)  $\delta$  149.6 (C), 132.5 (CH), 132.1 (C), 131.7 (CH), 130.8 (CH), 130.4 (C), 127.9

(CH), 122.8 (CH) [3 x CH and 2 x C are showing poor resolution even after more scans, may be due to the N-H bond resonance]; GCMS  $m/z$  228.10, calcd for  $C_{13}H_9ClN_2$  228.0454.

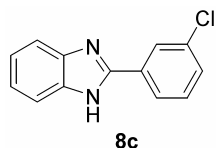

**2-(3-Chloro-phenyl)-1H-benzimidazole (8c):** Purified by column chromatography using EtOAc/hexane and isolated as a solid. IR (KBr):  $\nu_{max}$  1570, 1489, 1402, 1315, 1228, 1078, 787, 680 and 418  $cm^{-1}$ ;  $^1H$  NMR (DMSO- $D_6$ )  $\delta$  8.24 (1H, br s), 8.15 (1H, m), 7.62-7.54 (4H, m), 7.24 (2H, m);  $^{13}C$  NMR (DMSO- $D_6$ , DEPT-135)  $\delta$  150.2 (C), 134.2 (C), 132.7 (C), 131.4 (CH), 130.0 (CH), 126.5 (CH), 125.5 (CH), 122.9 (CH, broad peak) [3 x CH and 2 x C are showing poor resolution even after more scans, may be due to the N-H bond resonance]; GCMS  $m/z$  228.10, calcd for  $C_{13}H_9ClN_2$  228.0454.

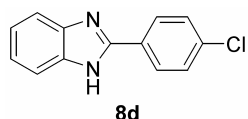

**2-(4-Chloro-phenyl)-1H-benzimidazole (8d):** Purified by column chromatography using EtOAc/hexane and isolated as a solid. IR (KBr):  $\nu_{max}$  3020, 1585, 1489, 1273, 1107, 1014, 763, 586, 470 and 432  $cm^{-1}$ ;  $^1H$  NMR (DMSO- $D_6$ )  $\delta$  8.19 (2H, d,  $J = 8.4$  Hz), 7.63 (4H, m), 7.23 (2H, br s);  $^{13}C$  NMR (DMSO- $D_6$ , DEPT-135)  $\delta$  150.6 (C), 134.9 (C), 129.5 (2 x CH), 128.6 (2 x CH), 122.8 (CH, broad peak) [3 x CH and 2 x C are showing poor resolution even after more scans, may be due to the N-H bond resonance]; GCMS  $m/z$  228.00, calcd for  $C_{13}H_9ClN_2$  228.0454.

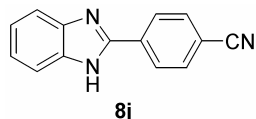

**4-(1H-Benzimidazol-2-yl)-benzonitrile (8j):** Purified by column chromatography using EtOAc/hexane and isolated as a solid. IR (KBr):  $\nu_{max}$  3051, 2229, 1658, 1547, 1477, 1280, 744 and 420  $cm^{-1}$ ;  $^1H$  NMR (DMSO- $D_6$ )  $\delta$  8.34 (2H, d,  $J = 8.0$  Hz), 8.02 (2H, d,  $J = 8.4$  Hz), 7.65 (2H, m), 7.27 (2H, br s);  $^{13}C$  NMR (DMSO- $D_6$ , DEPT-135)  $\delta$  149.8 (C), 134.7 (C), 133.4 (2 x CH), 127.4 (2 x CH), 123.3 (CH, broad peak), 119.1 (C), 112.4 (C,  $C\equiv N$ ) [3 x CH and 2 x C are showing poor resolution even after more scans, may be due to the N-H bond resonance]; GCMS  $m/z$  219.10, calcd for  $C_{14}H_9N_3$  219.0796.

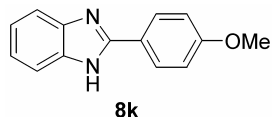

**2-(4-Methoxy-phenyl)-1H-benzimidazole (8k):** Purified by column chromatography using EtOAc/hexane and isolated as a solid. IR (KBr):  $\nu_{max}$  3043, 1616, 1589, 1462, 1224, 1003, 763, 682 and 420  $cm^{-1}$ ;  $^1H$  NMR (DMSO- $D_6$ )  $\delta$  8.11 (2H, d,  $J = 8.0$  Hz), 7.55 (2H, br s), 7.17 (2H, br s), 7.11 (2H, d,  $J = 8.0$  Hz), 3.84 (3H, s,  $OCH_3$ );  $^{13}C$  NMR (DMSO- $D_6$ , DEPT-135)  $\delta$  160.6 (C), 151.3 (C), 128.0 (2 x CH), 122.7 (C), 121.8 (CH), 114.4 (2 x CH), 55.3 ( $CH_3$ ) [3 x CH and 2 x C are showing poor resolution even after more scans, may be due to the N-H bond resonance]; GCMS  $m/z$  224.10, calcd for  $C_{14}H_{12}N_2O$  224.0950.

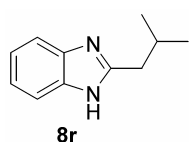

**2-Isobutyl-1H-benzimidazole (8r):** Purified by column chromatography using EtOAc/hexane and isolated as a solid. IR (KBr):  $\nu_{max}$  3057, 2957, 1626, 1548, 1425, 1269, 1026, 746 and 488  $cm^{-1}$ ;  $^1H$  NMR (DMSO- $D_6$ )  $\delta$  7.46 (2H, m), 7.11 (2H, m), 2.68 (2H, d,  $J = 7.1$  Hz), 2.17 (1H, m), 0.92 (6H, d,  $J = 6.6$  Hz);  $^{13}C$  NMR (DMSO- $D_6$ , DEPT-135)  $\delta$  154.8 (C), 121.5 (CH), 38.1 ( $CH_2$ ), 28.1 (CH), 22.8 ( $CH_3$ ), 22.7 ( $CH_3$ ) [3 x CH and 2 x C are showing poor resolution even after more scans, may be due to the N-H bond resonance]; GCMS  $m/z$  174.00, calcd for  $C_{11}H_{14}N_2$  174.1157.

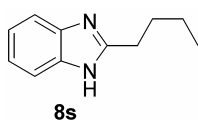

**2-Butyl-1H-benzimidazole (8s):** Purified by column chromatography using EtOAc/hexane and isolated as a solid. IR (KBr):  $\nu_{\max}$  3082, 2957, 1539, 1419, 1273, 1028 and  $750\text{ cm}^{-1}$ ;  $^1\text{H NMR}$  (DMSO- $\text{D}_6$ )  $\delta$  7.45 (2H, br s), 7.09 (2H, m), 2.79 (2H, t,  $J = 7.6$  Hz), 1.73 (2H, m), 1.35 (2H, m), 0.90 (3H, t,  $J = 7.2$  Hz);  $^{13}\text{C NMR}$  (DMSO- $\text{D}_6$ , DEPT-135)  $\delta$  155.6 (C), 121.5 (CH), 30.1 ( $\text{CH}_2$ ), 28.6 ( $\text{CH}_2$ ), 22.2 ( $\text{CH}_2$ ), 14.1 ( $\text{CH}_3$ ) [3 x CH and 2 x C are showing poor resolution even after more scans, may be due to the N-H bond resonance]; GCMS  $m/z$  174.00, calcd for  $\text{C}_{11}\text{H}_{14}\text{N}_2$  174.1157.

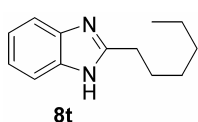

**2-Hexyl-1H-benzimidazole (8t):** Purified by column chromatography using EtOAc/hexane and isolated as a solid. IR (KBr):  $\nu_{\max}$  2928, 1620, 1539, 1421, 1273, 1026 and  $750\text{ cm}^{-1}$ ;  $^1\text{H NMR}$  (DMSO- $\text{D}_6$ )  $\delta$  7.44 (2H, m), 7.09 (2H, m), 2.78 (2H, t,  $J = 7.6$  Hz), 1.74 (2H, m), 1.28 (6H, m), 0.85 (3H, t,  $J = 7.2$  Hz);  $^{13}\text{C NMR}$  (DMSO- $\text{D}_6$ , DEPT-135)  $\delta$  155.6 (C), 121.5 (CH), 31.4 ( $\text{CH}_2$ ), 29.0 ( $\text{CH}_2$ ), 28.8 ( $\text{CH}_2$ ), 28.0 ( $\text{CH}_2$ ), 22.5 ( $\text{CH}_2$ ), 14.4 ( $\text{CH}_3$ ) [3 x CH and 2 x C are showing poor resolution even after more scans, may be due to the N-H bond resonance]; GCMS  $m/z$  202.15, calcd for  $\text{C}_{13}\text{H}_{18}\text{N}_2$  202.1470.

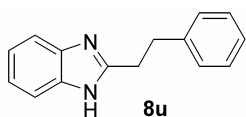

**2-Phenethyl-1H-benzimidazole (8u):** Purified by column chromatography using EtOAc/hexane and isolated as a solid. IR (KBr):  $\nu_{\max}$  2924, 1626, 1539, 1419, 1028, 750 and  $472\text{ cm}^{-1}$ ;  $^1\text{H NMR}$  (DMSO- $\text{D}_6$ )  $\delta$  7.50 (1H, br s), 7.27 (5H, m), 7.20-7.10 (3H, m), 3.11 (4H, br s);  $^{13}\text{C NMR}$  (DMSO- $\text{D}_6$ , DEPT-135)  $\delta$  154.8 (C), 141.5 (C), 128.8 (2 x CH), 128.7 (2 x CH), 126.5 (CH), 121.6 (CH, broad peak), 33.8 ( $\text{CH}_2$ ), 30.8 ( $\text{CH}_2$ ) [3 x CH and 2 x C are showing poor resolution even after more scans, may be due to the N-H bond resonance]; GCMS  $m/z$  221.10 ( $\text{M} - \text{H}^+$ ), calcd for  $\text{C}_{15}\text{H}_{14}\text{N}_2$  222.1157.

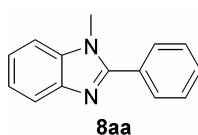

**1-Methyl-2-phenyl-1H-benzimidazole (8aa):** Purified by column chromatography using EtOAc/hexane and isolated as a solid. IR (neat):  $\nu_{\max}$  3063, 2924, 1614, 1597, 1464, 1093, 837 and  $746\text{ cm}^{-1}$ ;  $^1\text{H NMR}$  ( $\text{CDCl}_3$ )  $\delta$  7.82 (1H, m), 7.76 (2H, m), 7.52 (3H, m), 7.40 (1H, m), 7.32 (2H, m), 3.86 (3H, s,  $\text{NCH}_3$ );  $^{13}\text{C NMR}$  ( $\text{CDCl}_3$ , DEPT-135)  $\delta$  153.8 (C), 142.9 (C), 136.5 (C), 130.2 (C), 129.7 (CH), 129.4 (2 x CH), 128.6 (2 x CH), 122.8 (CH), 122.4 (CH), 119.8 (CH), 109.6 (CH), 31.6 ( $\text{CH}_3$ ); GCMS  $m/z$  207.10 ( $\text{M} - \text{H}^+$ ), calcd for  $\text{C}_{14}\text{H}_{12}\text{N}_2$  208.1000.

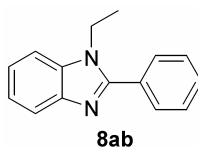

**1-Ethyl-2-phenyl-1H-benzimidazole (8ab):** Purified by column chromatography using EtOAc/hexane and isolated as a solid. IR (neat):  $\nu_{\max}$  3059, 2930, 1614, 1523, 1394, 1130, 1026, 744 and  $698\text{ cm}^{-1}$ ;  $^1\text{H NMR}$  ( $\text{CDCl}_3$ )  $\delta$  7.85 (1H, m), 7.75 (2H, m), 7.54 (3H, m), 7.45 (1H, m), 7.34 (2H, m), 4.32 (2H, q,  $J = 7.2$  Hz), 1.50 (3H, t,  $J = 7.2$  Hz);  $^{13}\text{C NMR}$  ( $\text{CDCl}_3$ , DEPT-135)  $\delta$  153.5 (C), 143.1 (C), 135.3 (C), 130.5 (C), 129.8 (CH), 129.2 (2 x CH), 128.7 (2 x CH), 122.7 (CH), 122.4 (CH), 119.9 (CH), 109.9 (CH), 39.6 ( $\text{CH}_2$ ), 15.2 ( $\text{CH}_3$ ).

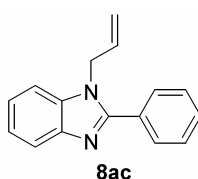

**1-Allyl-2-phenyl-1H-benzimidazole (8ac):** Purified by column chromatography using EtOAc/hexane and isolated as a solid. IR (neat):  $\nu_{\max}$  3063, 2922, 1612, 1444, 1284, 1028, 819 and  $594\text{ cm}^{-1}$ ;  $^1\text{H NMR}$  ( $\text{CDCl}_3$ )  $\delta$  7.85 (1H, m), 7.76 (2H, m), 7.49 (3H, m), 7.36-7.25 (3H, m), 6.06 (1H, m,  $\text{CH}=\text{CH}_2$ ), 5.31 (1H, d,  $J =$

10.4 Hz, CH=CH<sub>2</sub>), 5.08 (1H, d, *J* = 17.1 Hz, CH=CH<sub>2</sub>), 4.82 (2H, br s, NCH<sub>2</sub>CH=CH<sub>2</sub>); <sup>13</sup>C NMR (CDCl<sub>3</sub>, DEPT-135) δ 153.8 (C), 143.0 (C), 135.9 (C), 132.3 (CH), 130.1 (C), 129.8 (CH), 129.2 (2 x CH), 128.6 (2 x CH), 122.8 (CH), 122.5 (CH), 119.9 (CH), 117.4 (CH<sub>2</sub>), 110.3 (CH), 47.1 (CH<sub>2</sub>).

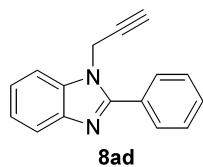

**2-Phenyl-1-prop-2-ynyl-1H-benzimidazole (8ad):** Purified by column chromatography using EtOAc/hexane and isolated as a solid. IR (neat):  $\nu_{\max}$  3059, 2926, 2119, 1614, 1521, 1460, 1080, 819 and 746 cm<sup>-1</sup>; <sup>1</sup>H NMR (CDCl<sub>3</sub>) δ 7.84 (3H, m), 7.52 (4H, m), 7.35 (2H, m), 4.92 (2H, d, *J* = 2.4 Hz, NCH<sub>2</sub>C≡CH), 2.46 (1H, t, *J* = 2.4 Hz, NCH<sub>2</sub>C≡CH); <sup>13</sup>C NMR (CDCl<sub>3</sub>, DEPT-135) δ 153.1 (C), 142.9 (C), 135.4 (C), 130.0 (CH), 129.5 (C), 129.3 (2 x CH), 128.9 (2 x CH), 123.2 (CH), 122.9 (CH), 120.0 (CH), 110.0 (CH), 77.4 (C, NCH<sub>2</sub>C≡CH), 73.9 (CH, NCH<sub>2</sub>C≡CH), 34.7 (CH<sub>2</sub>, NCH<sub>2</sub>C≡CH).
